# Supplementary material
Source: PubMed Central journal article supplement (PMC11105480)

Supplementary File 1

A

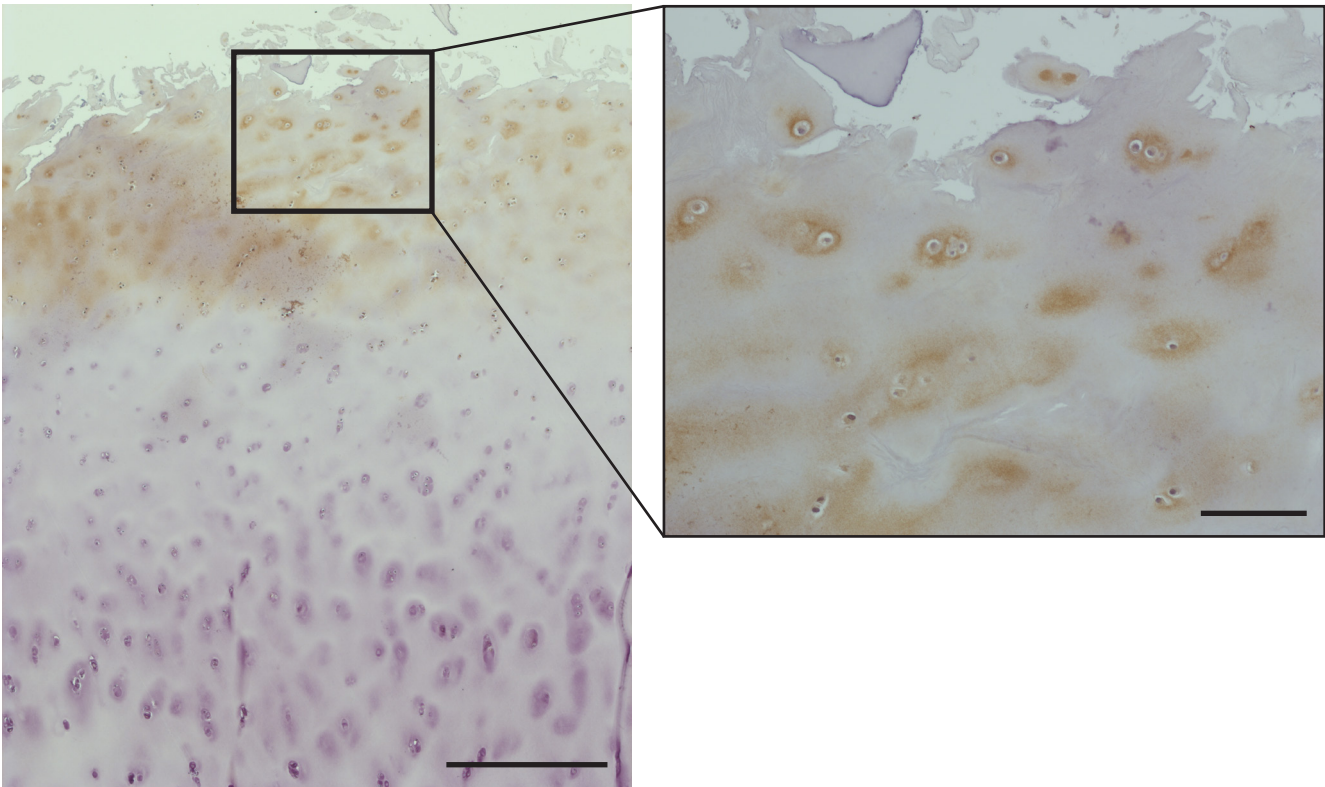

B

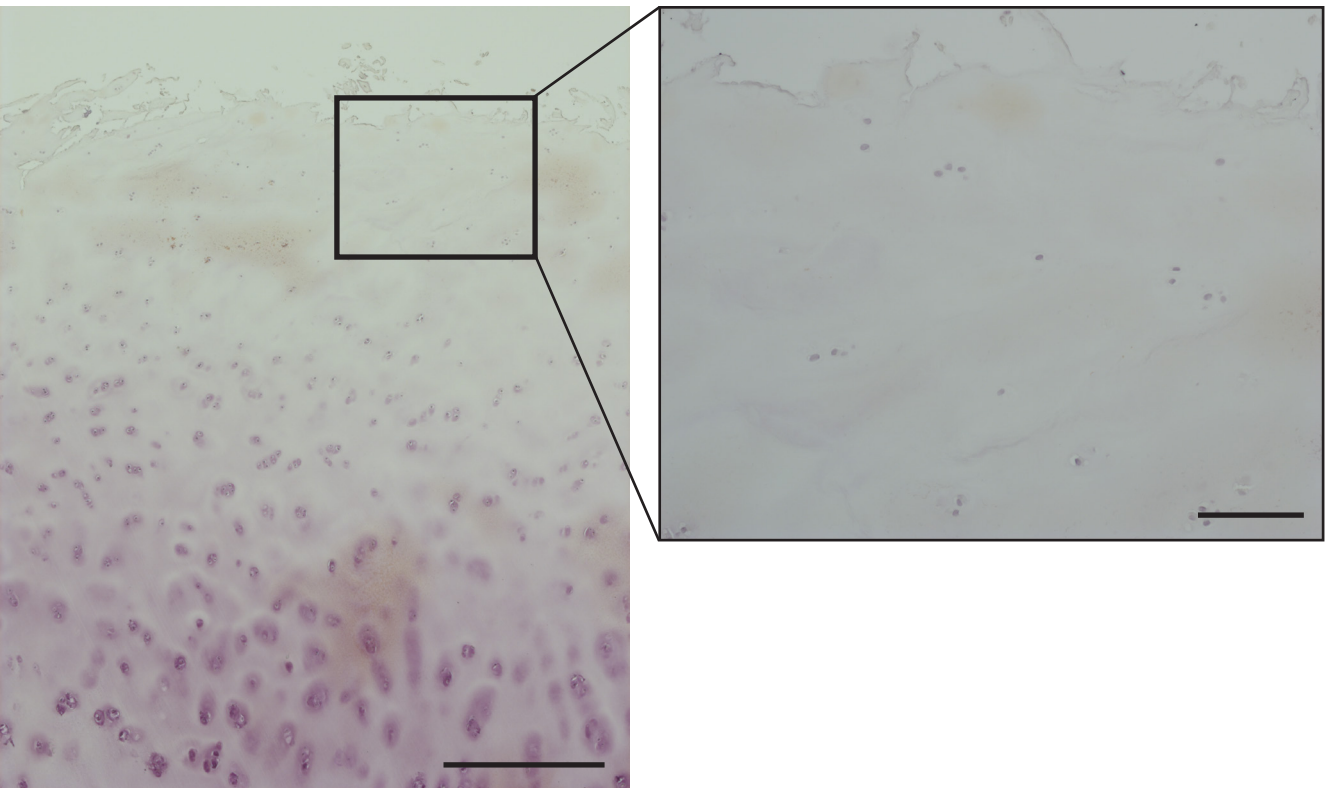

Supplement: 18_2018_2856_MOESM1_ESM.pdf [file 18_2018_2856_MOESM1_ESM.pdf]
