# Supplementary material
Source: PubMed Central journal article supplement (PMC11105480)

# Supplementary File 3

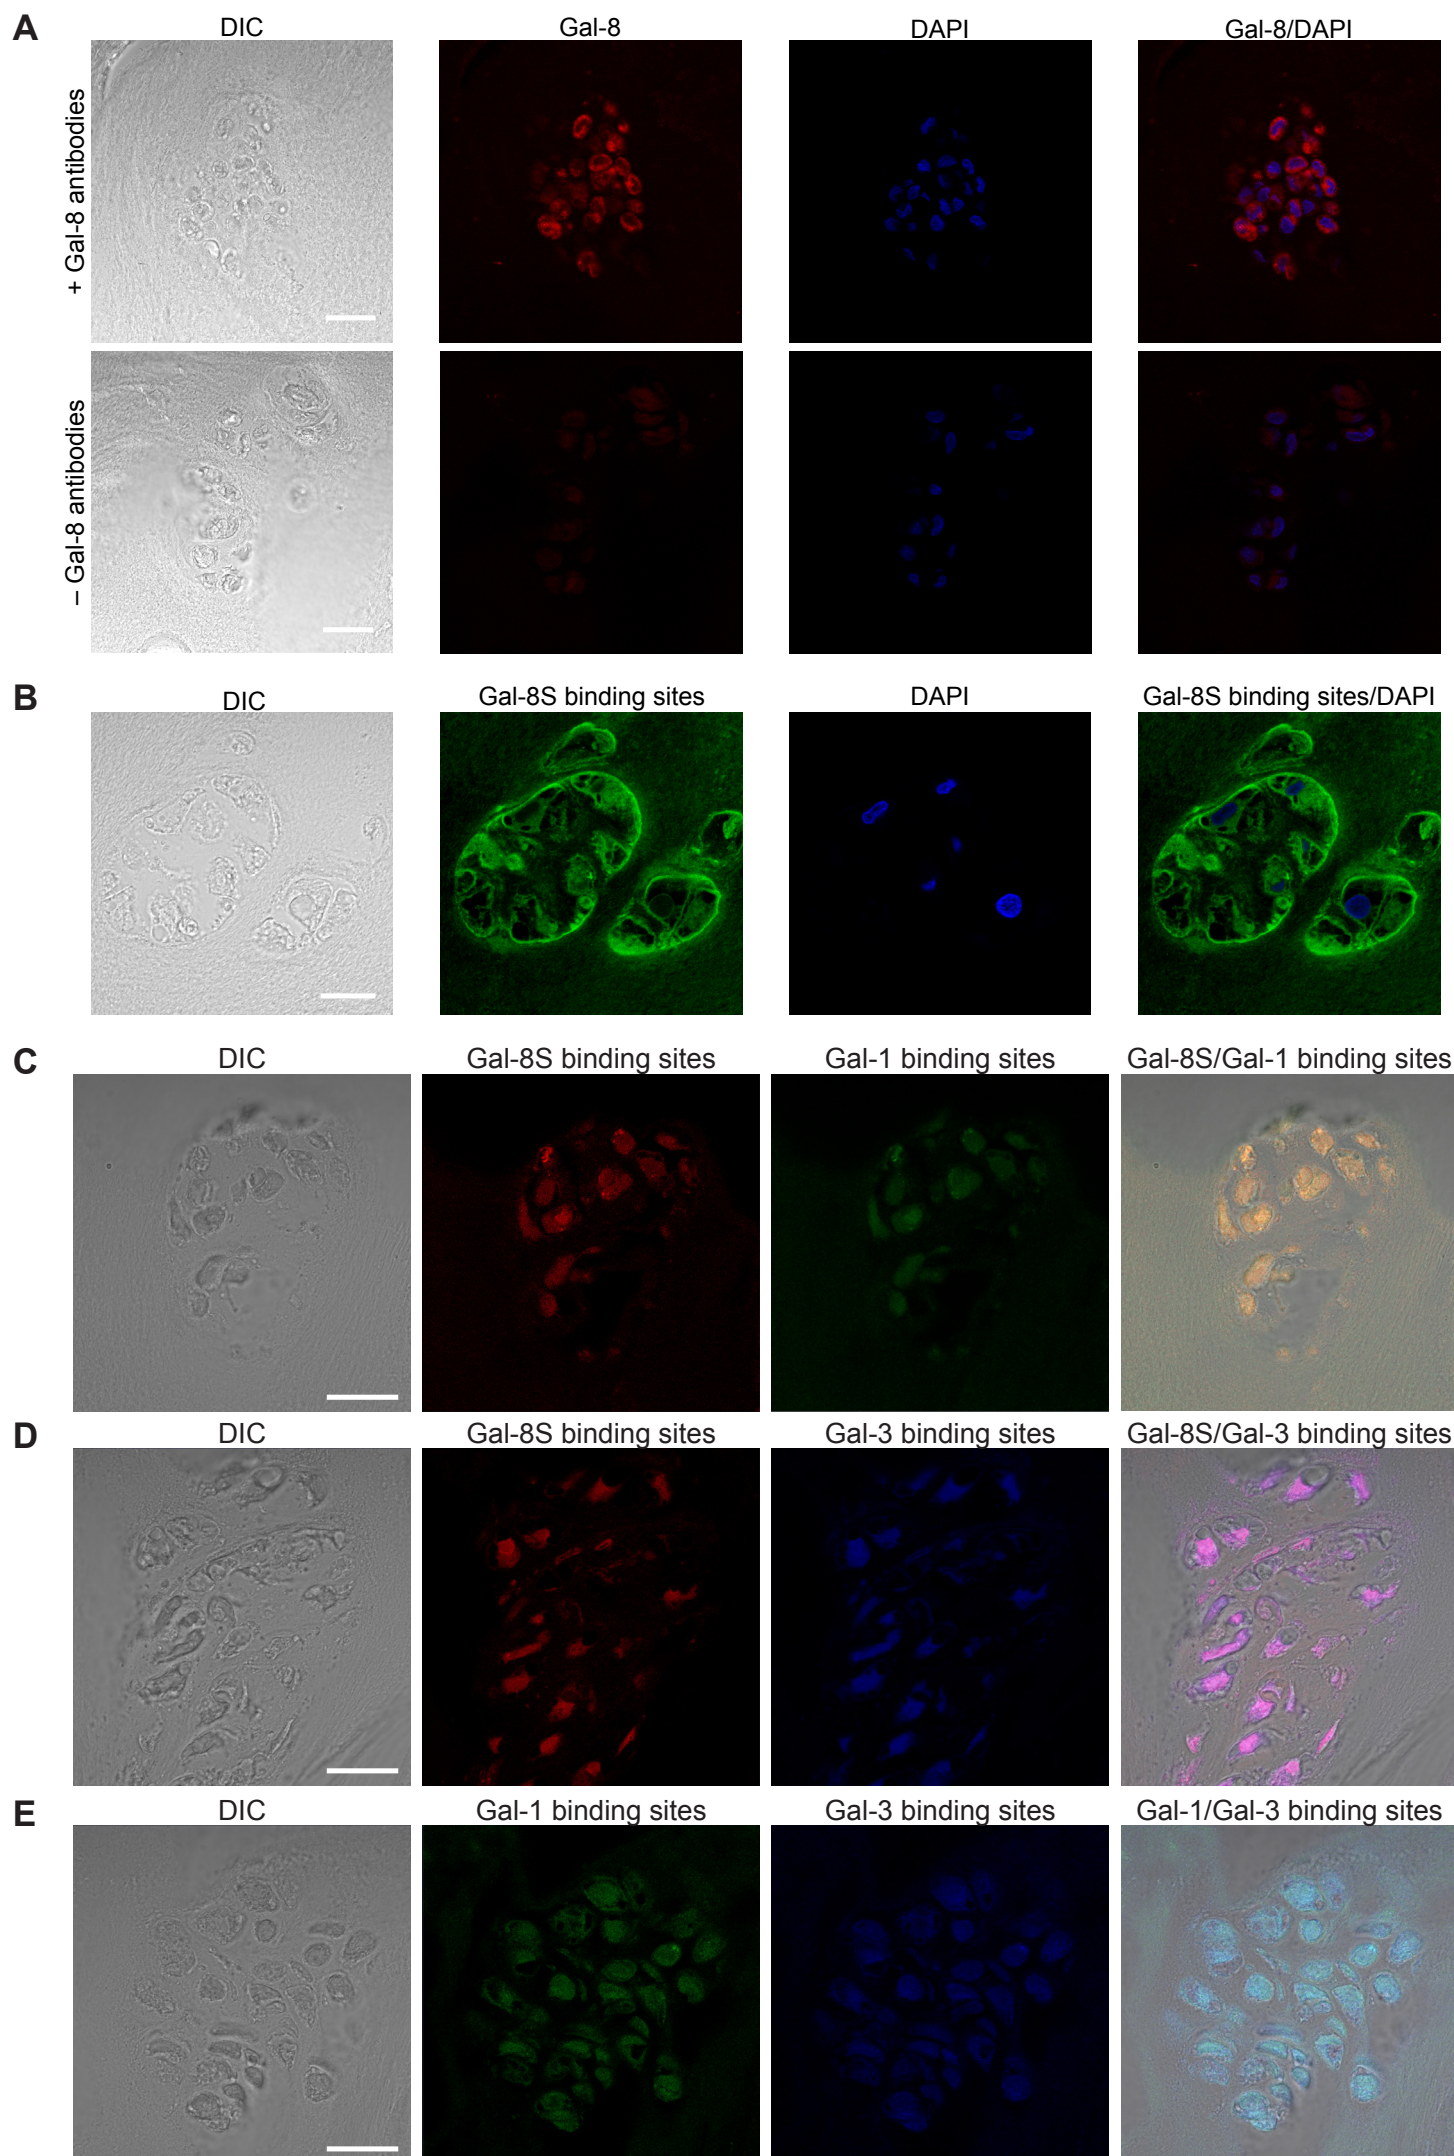

Supplement: 18_2018_2856_MOESM3_ESM.pdf [file 18_2018_2856_MOESM3_ESM.pdf]
