# Supplementary material
Source: PubMed Central journal article supplement (PMC11105480)

# Supplementary File 10

**A**

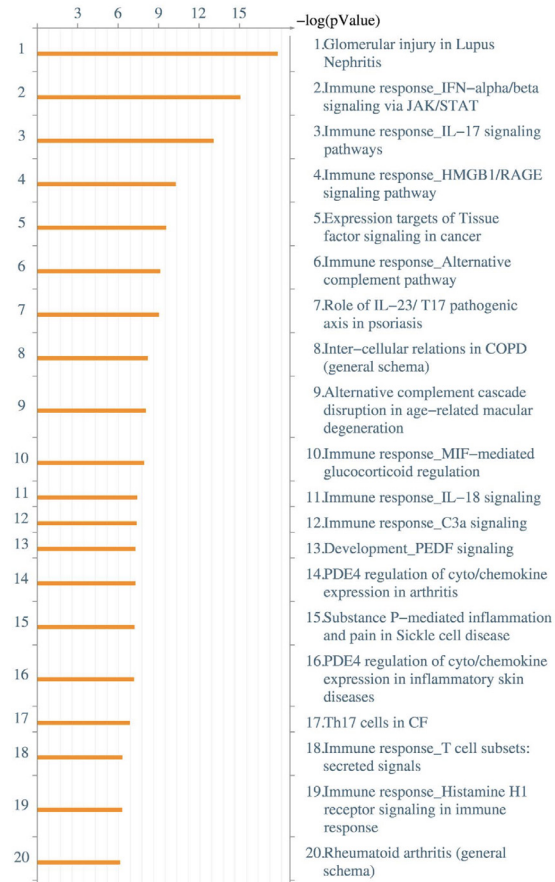

**B**

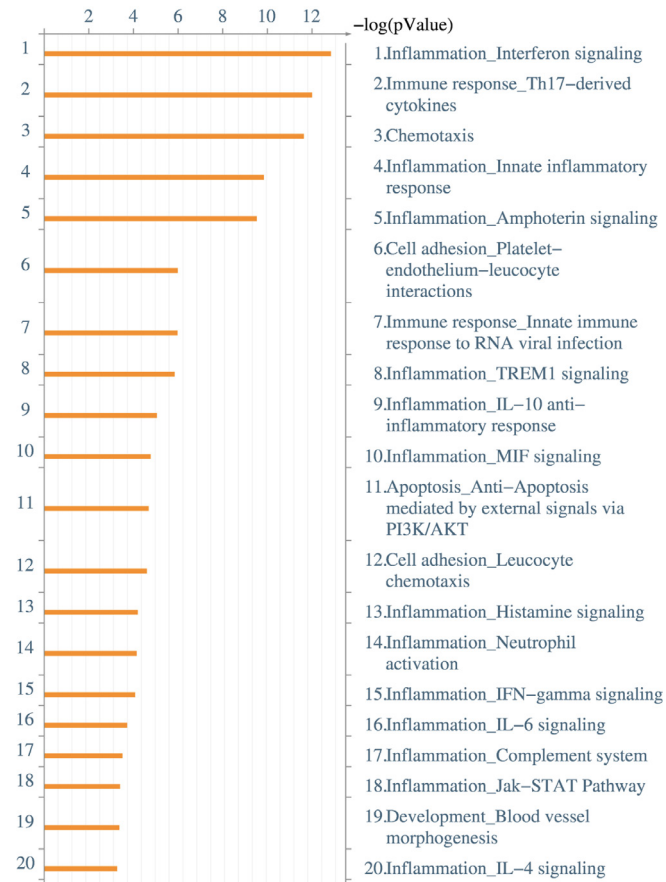

**C**

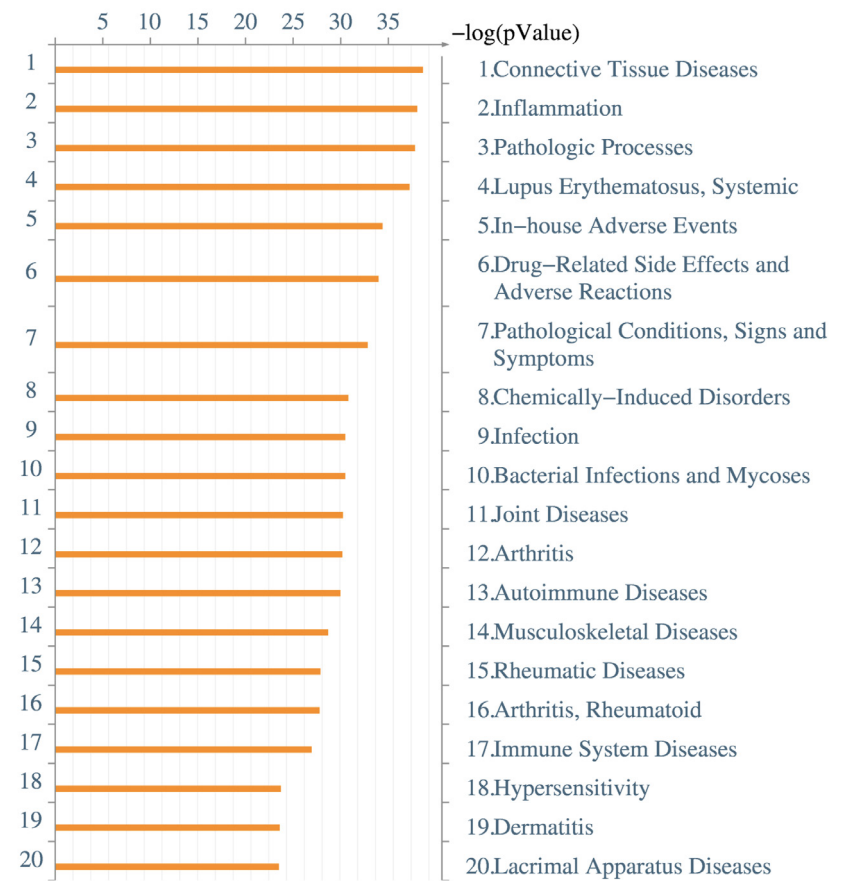

Supplement: 18_2018_2856_MOESM10_ESM.pdf [file 18_2018_2856_MOESM10_ESM.pdf]
